# Supplementary material
Source: publisher site journal article supplement (https://www.dovepress.com/article/420254)
Supplement: Supplementary file 1 [file get_supplementary_file.php]

**Table S1.** List of fusion gene

---

| List of fusion gene |                       |                     |                     |
|---------------------|-----------------------|---------------------|---------------------|
| MLL/AF4             | MLL/AF6               | MLL/AF9             | MLL/AF10            |
| MLL/AF17            | MLL/AF1P              | MLL/AF1Q            | MLL/AFX             |
| MLL/ELL             | MLL/ENL               | NuP98/HOxA11        | CBF $\beta$ /MYH11  |
| AML1/ETO            | AML1/MDS1             | SET/CAN             | DEK/CAN             |
| PML/RAR $\alpha$    | PLZF/RAR $\alpha$     | NPM/RAR $\alpha$    | STAT5b/RAR $\alpha$ |
| NuMA1/RAR $\alpha$  | PRKARIA/RAR $\alpha$  | FIPIL1/RAR $\alpha$ | NPM/ALK             |
| NuP98/HOxC11        | TCF3/PBX1             | BCR/ABL1            | NPM/MLF1            |
| NuP98/HOxD13        | NuP98/HOxA9           | TLS/ERG             | SIL/TAL1            |
| ETV6/PDGFR $\alpha$ | FIPIL1/PDGFR $\alpha$ | ETV6/PDGFR $\beta$  | EV11                |
| NuP98/PMX1          | NuP98/HOxA13          |                     |                     |

---
